# Supplementary material for: Modification of plant cell wall structure accompanied by enhancement of saccharification efficiency using a chemical, lasalocid sodium
Source: PubMed Central journal article supplement (PMC5046155; doi:10.1038/srep34602), 2016-10-03
Supplement: srep34602-s1.pdf [file srep34602-s1.pdf]

## **Supplementary Information**

### **Modification of plant cell wall structure accompanied by enhancement of saccharification efficiency using a chemical, lasalocid sodium.**

Emiko Okubo-Kurihara, Misato Ohtani, Yukio Kurihara, Koichi Kakegawa, Megumi Kobayashi, Noriko Nagata, Takanori Komatsu, Jun Kikuchi, Sean Cutler, Taku Demura, Minami Matsui

**Supplementary Table 1.**

**Amounts of cell wall fraction (dry weight of cell wall fraction (mg)/fresh cell weight (g))**

|         | 1    | 2    | 3    | Mean      | SD        | t-test p  |
|---------|------|------|------|-----------|-----------|-----------|
| 0 mM LA | 2.17 | 1.97 | 1.96 | 2.0333333 | 0.1184624 | 0.1626752 |
| 1 mM LA | 2.06 | 2.26 | 2.36 | 2.2266667 | 0.1527525 |           |

**Supplementary Table 2.****Upregulated peroxidase genes by lasalocid sodium treatment.**

| AGI_typeIII | ratio (L.S./L.S.-) | p-value     |
|-------------|--------------------|-------------|
| AT1G30870   | 2.390825532        | 0.045500028 |
| AT1G77100   | 6.638529875        | 0.002147679 |
| AT1G44970   | 2.333377774        | 0.002444302 |
| AT2G18980   | 2.426538478        | 0.006670234 |
| AT2G18150   | 2.121583451        | 0.026212585 |
| AT2G38390   | 1.812834284        | 0.041681493 |
| AT2G38380   | 3.849472037        | 0.001373    |
| AT2G43480   | 2.104803024        | 0.011065619 |
| AT2G35380   | 2.417221501        | 0.015028364 |
| AT2G39040   | 3.394290759        | 0.023237499 |
| AT3G21770   | 1.899422178        | 0.003658363 |
| AT3G32980   | 2.133679202        | 0.019458402 |
| AT3G28200   | 2.331834848        | 0.002198158 |
| AT3G49120   | 2.212956789        | 0.010617783 |
| AT3G01190   | 1.977342613        | 0.048400546 |
| AT4G11290   | 2.260416256        | 0.037882252 |
| AT4G16270   | 3.989415454        | 0.004370708 |
| AT4G08770   | 2.635296974        | 0.032251225 |
| AT5G19890   | 3.477466309        | 0.029312709 |
| AT5G15180   | 3.418082304        | 9.93782E-05 |
| AT5G42180   | 1.90501404         | 0.012719948 |
| AT5G06720   | 3.156687091        | 0.003947764 |
| AT5G22410   | 2.248570067        | 0.042149973 |

**Supplementary Table 3.****Upregulated jasmonic acid related genes by lasalocid sodium treatment.**

| AGI       | ratio (L.S./L.S.-) | p-value   | description                                              |
|-----------|--------------------|-----------|----------------------------------------------------------|
| AT1G17420 | 2.256731804        | 0.0171956 | lipoxygenase 3                                           |
| AT1G18570 | 1.580353634        | 0.0232525 | myb domain protein 51                                    |
| AT1G32640 | 1.565434482        | 2.04E-05  | Basic helix-loop-helix (bHLH) DNA-binding family protein |
| AT2G06050 | 1.524838284        | 0.0366132 | oxophytodienoate-reductase 3                             |
| AT2G18950 | 1.795980687        | 0.0426036 | homogentisate phytyltransferase 1                        |
| AT2G25000 | 2.48145509         | 0.0018395 | WRKY DNA-binding protein 60                              |
| AT2G27690 | 3.625572602        | 0.0001889 | cytochrome P450                                          |
| AT2G30040 | 1.536868868        | 0.030085  | mitogen-activated protein kinase kinase kinase 14        |
| AT2G30770 | 2.085796685        | 0.0078628 | cytochrome P450                                          |
| AT2G31180 | 3.023821266        | 0.0245391 | myb domain protein 14                                    |
| AT2G34810 | 2.250651546        | 0.0402208 | FAD-binding Berberine family protein                     |
| AT3G25770 | 3.766125522        | 0.0481833 | allene oxide cyclase 2                                   |
| AT3G25780 | 3.282504691        | 0.0270983 | allene oxide cyclase 3                                   |
| AT3G51450 | 1.564467099        | 0.0005903 | Calcium-dependent phosphotriesterase superfamily protein |
| AT4G10390 | 2.967398587        | 0.0305883 | Protein kinase superfamily protein                       |
| AT4G22880 | 2.06999455         | 0.0422655 | leucoanthocyanidin dioxygenase                           |
| AT4G23600 | 4.600489294        | 0.0014856 | Tyrosine transaminase family protein                     |
| AT4G23810 | 1.839693721        | 0.0380228 | WRKY family transcription factor                         |
| AT4G31500 | 2.283363731        | 0.0233859 | cytochrome P450                                          |
| AT5G24780 | 1.547538126        | 0.0486586 | vegetative storage protein 1                             |
| AT5G26170 | 2.737356241        | 0.0012468 | WRKY DNA-binding protein 50                              |
| AT5G38710 | 1.508122501        | 0.0100583 | Methylenetetrahydrofolate reductase family protein       |
| AT5G46050 | 3.018716187        | 0.0056722 | peptide transporter 3                                    |
| AT5G47120 | 1.504890195        | 0.0417658 | BAX inhibitor 1                                          |
| AT5G53750 | 2.384315054        | 0.0404669 | CBS domain-containing protein                            |
| AT5G58670 | 1.722406645        | 0.0273352 | phospholipase C1                                         |
| AT5G61420 | 8.38997306         | 0.0194284 | myb domain protein 28                                    |



**Supplementary Table 4.****Upregulated lignin biosynthetic genes by lasalocid sodium treatment.**

| *Gene ID  | Ratio(L+/L-) | p-value  | Description                                            |
|-----------|--------------|----------|--------------------------------------------------------|
| AT1G51680 | 1.551724713  | 0.003499 | 4-coumarate:CoA ligase                                 |
| AT2G40890 | 1.574141     | 0.019855 | Cytochrome P450                                        |
| AT4G34050 | 1.50418588   | 0.001167 | Caffeoyl coenzyme A O-methyltransferase                |
| AT4G36220 | 1.478068039  | 0.016125 | Ferulic acid 5-hydroxylase                             |
| AT5G54160 | 1.544012507  | 0.010573 | Caffeic acid/5-hydroxyferulic acid O-methyltransferase |
| AT5G42180 | 1.90501404   | 0.01272  | Lignin peroxidase                                      |
| AT5G66690 | 2.508664193  | 0.002748 | Monolignol glucosyltransferase                         |
| AT5G26310 | 2.377828162  | 0.001325 | Monolignol glucosyltransferase                         |

\*These genes are selected from Zhao et al. *Plant Cell* **25**, 3976-3987 (2013).

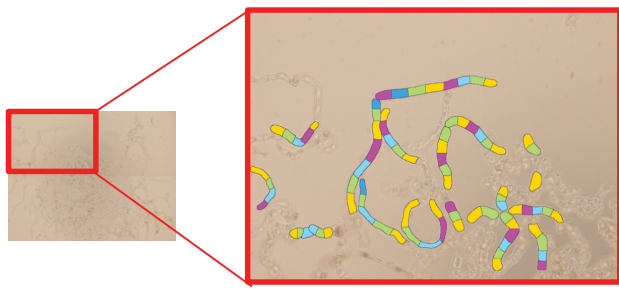

Mock treatment

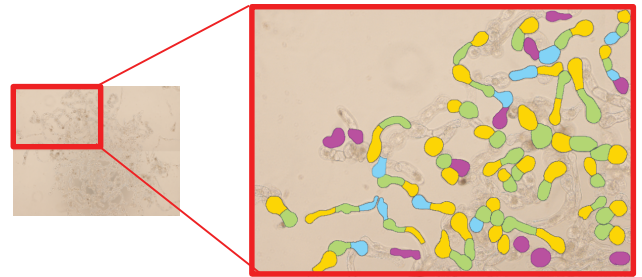

Chemical treatment

**Supplementary Figure 1.** Typical cell shape in the control tobacco BY-2 cells (left) and an example of abnormal cell shapes observed after chemical treatment (right). In the panel, cells were colored to make the shapes clear.

A

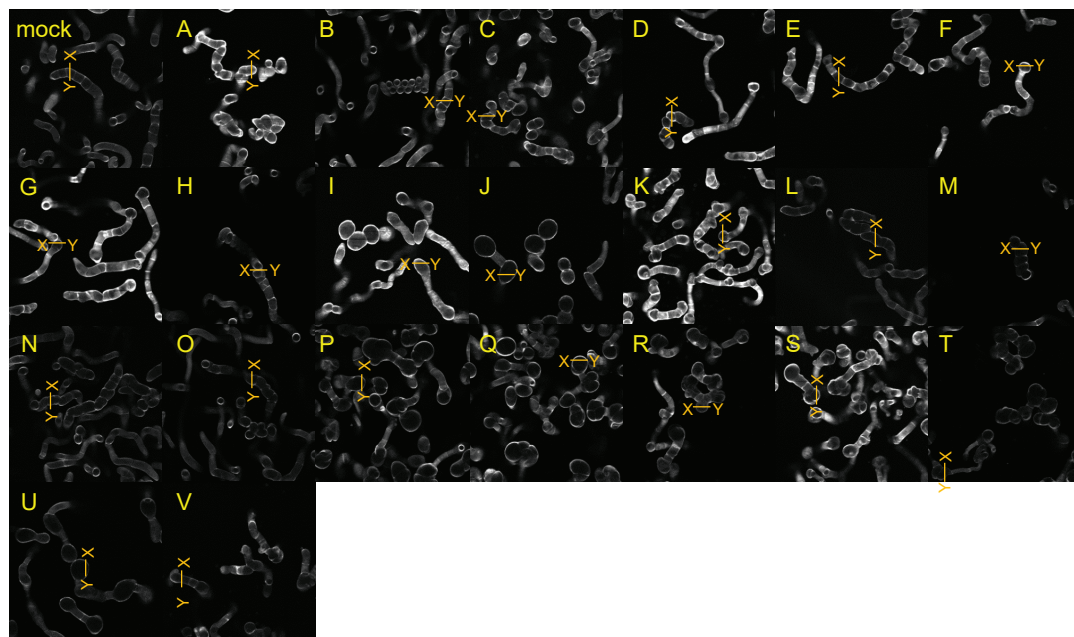

B

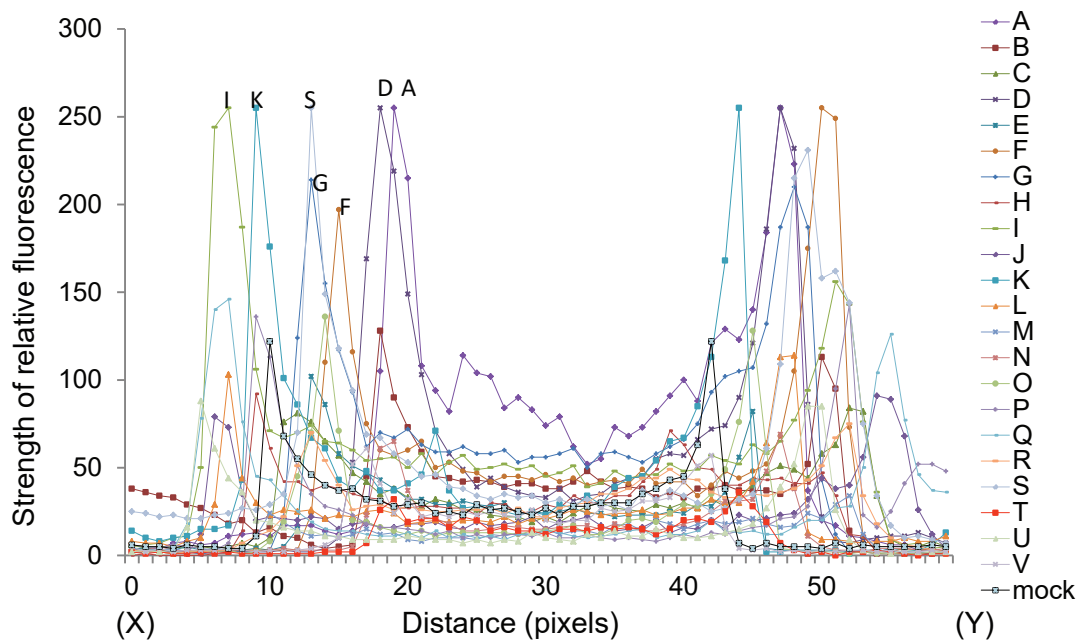

**Supplementary Figure 2.** Second screening of chemicals based on calcofluor staining.

(A) Confocal microscope images of BY-2 cells treated with 22 candidate compounds A-V after calcofluor staining.

(B) Calcofluor signal intensities of X-Y incisions in (A).

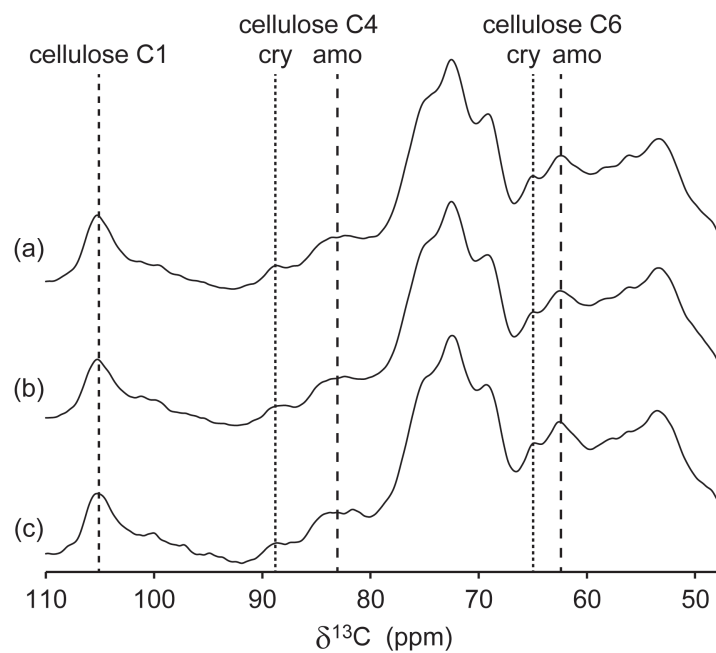

**Supplementary Figure 3.** CP-MAS spectra of cell walls of BY-2 cells treated with or without lasalocid sodium. (a) The cell walls of BY-2 cells treated with 1  $\mu\text{M}$  lasalocid sodium. (b) The cell walls of BY-2 cells treated with 0.1  $\mu\text{M}$  lasalocid sodium. (c) Control. Signals indicated with dotted lines were annotated with cellulose according to previous reports (Mori et al., 2012 and Komatsu et al., 2013). cry: I $\beta$ -crystalline cellulose, amo: amorphous cellulose.

Komatsu, T. & Kikuchi, J. Selective Signal Detection in Solid-State NMR Using Rotor-Synchronized Dipolar Dephasing for the Analysis of Hemicellulose in Lignocellulosic Biomass. *J. Phys. Chem. Lett.* 4, 2279-2283 (2013).

Mori, T., Chikayama, E., Tsuboi, Y., Ishida, N., Shisa, N., Noritake, Y., Moriya, S. & Kikuchi, J. Exploring the conformational space of amorphous cellulose using NMR chemical shifts. *Carbohydr. Polym.* 90, 1197-1203 (2012).

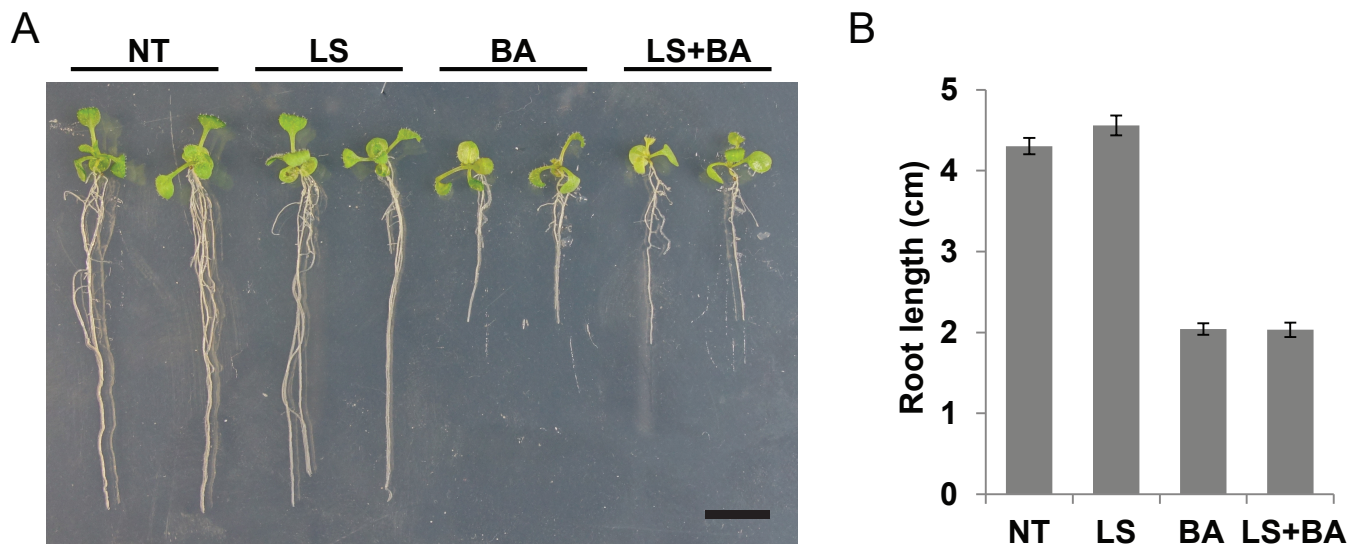

**Supplementary Figure 4.** Root length measurement in *Arabidopsis* seedlings grown on medium containing boron and/or LS. (A) Five-day-old *Arabidopsis* seedlings were transferred onto four kinds of growth conditions; Non-Treated (NT), 0.5  $\mu\text{M}$  Lasalocid Sodium (LS), 5 mM Boric Acids (BA) and 0.5  $\mu\text{M}$  Lasalocid Sodium and 5 mM Boric Acids (LS+B), and the root lengths were measured 5 days later. Scale bar = 1 cm.

(B) Root length.  $n = 30$ .

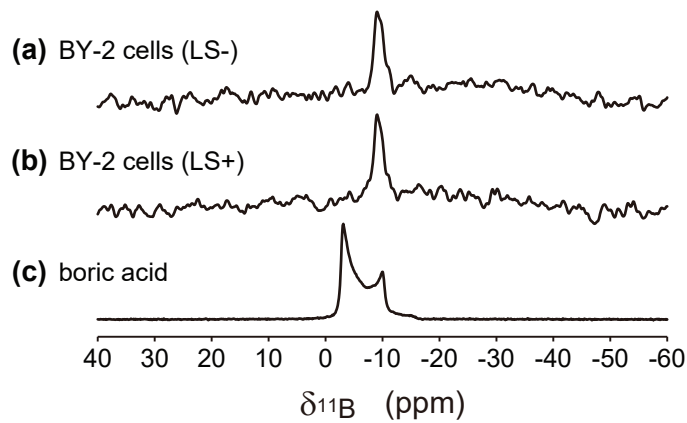

**Supplementary Figure 5.**  $^{11}\text{B}$  MAS NMR spectra of BY-2 cells to characterize insoluble boron in the cell wall. (a)  $^{11}\text{B}$  MAS NMR spectra of BY-2 cells without any treatment. (b)  $^{11}\text{B}$  MAS NMR spectra of BY-2 cells treated with X mM lasalocid sodium. There were identical symmetric peaks at -9.0 ppm in (a) and (b). These symmetric line shapes indicated that boron existed in tetrahedral configuration, because the local electric field gradient became small compared with other configurations such as for boric acid (c) [ref]. These symmetric  $^{11}\text{B}$  peaks were considered to be dimeric rhamnogalacturonan II (RG-II)-borate complex, in which two monomeric RG-IIs are cross-linked by borate–diol esterification. These spectra indicate there is no significant difference in structure of RG-II.

[ref] Kameda, T., Ishii, T., Matsunaga, T., and Ashida, J.,  $^{11}\text{B}$  Solid-state NMR Investigation of the Rhamnogalacturonan II-borate Complex in Plant Cell Walls, *Analytical Science* (2006) 22, 321-323 (doi.org/10.2116/analsci.22.321).

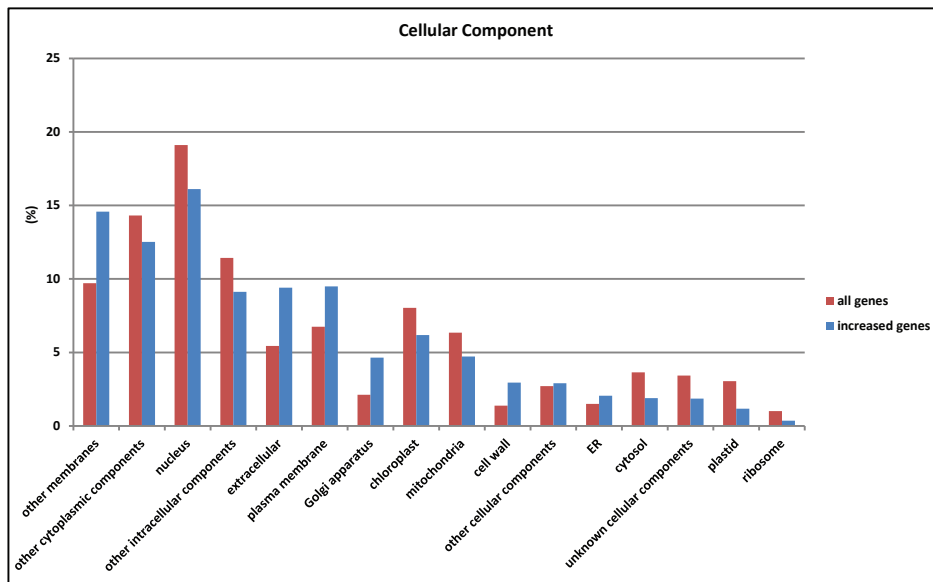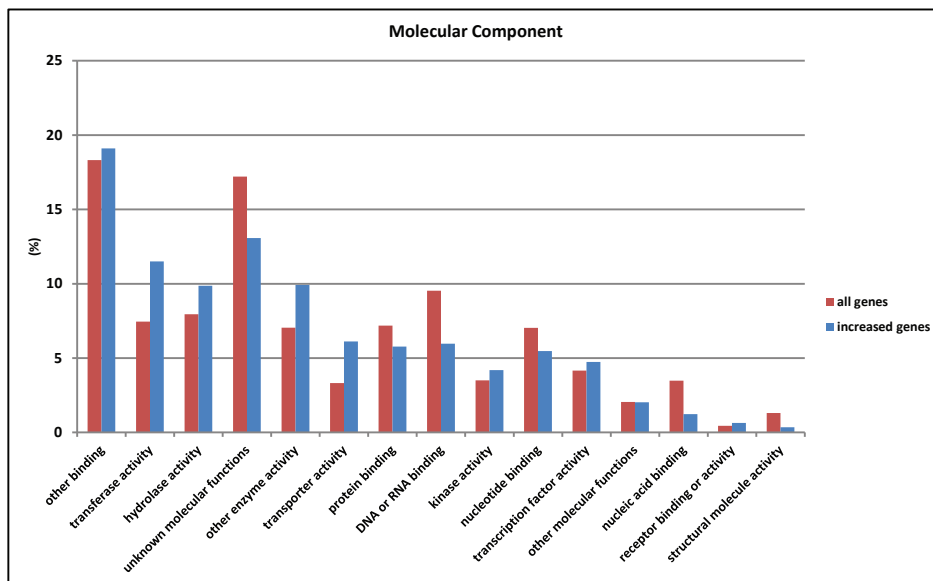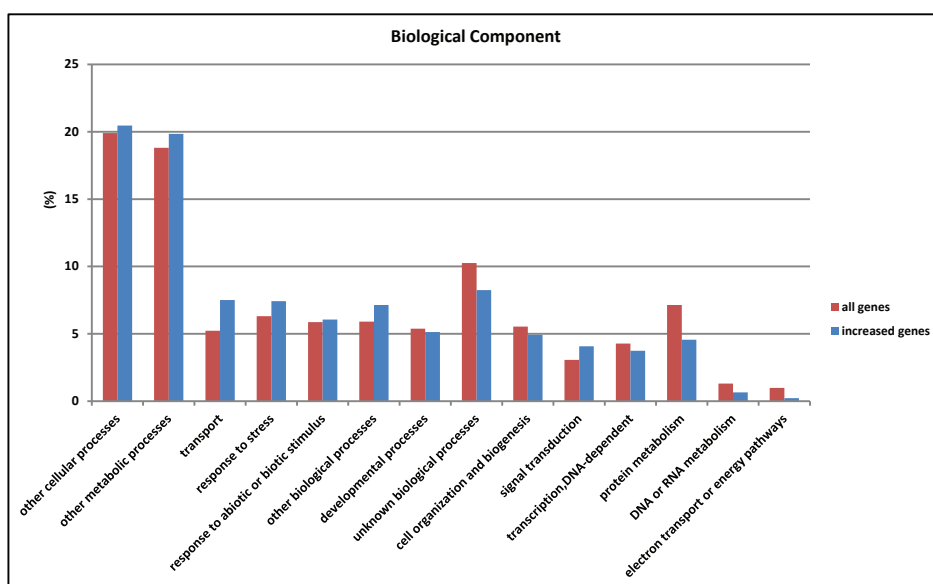

**Supplementary Figure 6.** Gene ontology analysis of genes with increased expression in presence of lasalocid sodium in microarray. The genes were compared with all genes with annotations in the Arabidopsis genome.
